# Supplementary material for: Widespread slowdown in thinning rates of West Antarctic ice shelves
Source: Copernicus journal article supplement (doi:10.5194/tc-17-3409-2023), 2023-08-23
Supplement: Supplementary file 1 [file tc-17-3409-2023-supplement.zip]

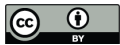

## *Supplement of*

# **Widespread slowdown in thinning rates of West Antarctic ice shelves**

**Fernando S. Paolo et al.**

*Correspondence to:* Fernando S. Paolo ([fernando@globalfishingwatch.org](mailto:fernando@globalfishingwatch.org)) and Alex S. Gardner ([alex.s.gardner@jpl.nasa.gov](mailto:alex.s.gardner@jpl.nasa.gov))

- [tc-17-3409-2023-supplement-title-page.pdf](#)
- [RECIPE.md](#)

The copyright of individual parts of the supplement might differ from the article licence.
