# Supplementary material for: Widespread slowdown in thinning rates of West Antarctic ice shelves
Source: Copernicus journal article supplement (doi:10.5194/tc-17-3409-2023), 2023-08-23
Supplement: Supplementary file 2 [file tc-17-3409-2023-supplement.zip]

Archive with 2 entries (2 files):
- RECIPE.md
- tc-17-3409-2023-supplement-title-page.pdf
